# Supplementary material for: The quest for the optimal biomarker: is extending the spectrum of targeted PIK3CA mutations in breast cancer carcinoma worthwhile?
Source: PubMed Central journal article supplement — Ann Transl Med. 2023 Aug 29;11(11):393. doi: 10.21037/atm-23-1608 (PMC10632578; doi:10.21037/atm-23-1608), 2023-08-29
Supplement: atm-11-11-393-coif.pdf [file atm-11-11-393-coif.pdf]

## ICMJE DISCLOSURE FORM

Date: 06/20/2023

Your Name: Dr Stanislas QUESADA

Manuscript Title: The quest for the optimal biomarker: is extending the spectrum of targeted *PIK3CA* mutations in breast cancer carcinoma worthwhile?

Manuscript number (if known): ATM-23-1608

In the interest of transparency, we ask you to disclose all relationships/activities/interests listed below that are related to the content of your manuscript. "Related" means any relation with for-profit or not-for-profit third parties whose interests may be affected by the content of the manuscript. Disclosure represents a commitment to transparency and does not necessarily indicate a bias. If you are in doubt about whether to list a relationship/activity/interest, it is preferable that you do so.

The following questions apply to the author's relationships/activities/interests as they relate to the current manuscript only.

The author's relationships/activities/interests should be defined broadly. For example, if your manuscript pertains to the epidemiology of hypertension, you should declare all relationships with manufacturers of antihypertensive medication, even if that medication is not mentioned in the manuscript.

In item #1 below, report all support for the work reported in this manuscript without time limit. For all other items, the time frame for disclosure is the past 36 months.

|                                                           |                                                                                                                                                                                | Name all entities with whom you have this relationship or indicate none (add rows as needed) | Specifications/Comments (e.g., if payments were made to you or to your institution) |
|-----------------------------------------------------------|--------------------------------------------------------------------------------------------------------------------------------------------------------------------------------|----------------------------------------------------------------------------------------------|-------------------------------------------------------------------------------------|
| <b>Time frame: Since the initial planning of the work</b> |                                                                                                                                                                                |                                                                                              |                                                                                     |
| 1                                                         | All support for the present manuscript (e.g., funding, provision of study materials, medical writing, article processing charges, etc.)<br><b>No time limit for this item.</b> | <u>  X  </u> None                                                                            |                                                                                     |
|                                                           |                                                                                                                                                                                |                                                                                              |                                                                                     |
|                                                           |                                                                                                                                                                                |                                                                                              |                                                                                     |
|                                                           |                                                                                                                                                                                |                                                                                              |                                                                                     |
|                                                           |                                                                                                                                                                                |                                                                                              |                                                                                     |
| <b>Time frame: past 36 months</b>                         |                                                                                                                                                                                |                                                                                              |                                                                                     |
| 2                                                         | Grants or contracts from any entity (if not indicated in item #1 above).                                                                                                       | <u>  X  </u> None                                                                            |                                                                                     |
|                                                           |                                                                                                                                                                                |                                                                                              |                                                                                     |
| 3                                                         | Royalties or licenses                                                                                                                                                          | <u>  X  </u> None                                                                            |                                                                                     |
|                                                           |                                                                                                                                                                                |                                                                                              |                                                                                     |
| 4                                                         | Consulting fees                                                                                                                                                                | <u>  X  </u> None                                                                            |                                                                                     |
|                                                           |                                                                                                                                                                                |                                                                                              |                                                                                     |
|                                                           |                                                                                                                                                                                |                                                                                              |                                                                                     |

|    |                                                                                                              |                                          |  |
|----|--------------------------------------------------------------------------------------------------------------|------------------------------------------|--|
| 5  | Payment or honoraria for lectures, presentations, speakers bureaus, manuscript writing or educational events | <input checked="" type="checkbox"/> None |  |
| 6  | Payment for expert testimony                                                                                 | <input checked="" type="checkbox"/> None |  |
| 7  | Support for attending meetings and/or travel                                                                 | <input checked="" type="checkbox"/> None |  |
| 8  | Patents planned, issued or pending                                                                           | <input checked="" type="checkbox"/> None |  |
| 9  | Participation on a Data Safety Monitoring Board or Advisory Board                                            | <input checked="" type="checkbox"/> None |  |
| 10 | Leadership or fiduciary role in other board, society, committee or advocacy group, paid or unpaid            | <input checked="" type="checkbox"/> None |  |
| 11 | Stock or stock options                                                                                       | <input checked="" type="checkbox"/> None |  |
| 12 | Receipt of equipment, materials, drugs, medical writing, gifts or other services                             | <input checked="" type="checkbox"/> None |  |
| 13 | Other financial or non-financial interests                                                                   | <input checked="" type="checkbox"/> None |  |

Please summarize the above conflict of interest in the following box:

None

Please place an "X" next to the following statement to indicate your agreement:

I certify that I have answered every question and have not altered the wording of any of the questions on this form.

## ICMJE DISCLOSURE FORM

**Date:** 20 June 2023

**Your Name:** William Jacot

**Manuscript Title:** The quest for the optimal biomarker: is extending the spectrum of targeted *PIK3CA* mutations in breast cancer carcinoma worthwhile?

**Manuscript number (if known):** ATM-23-1608

In the interest of transparency, we ask you to disclose all relationships/activities/interests listed below that are related to the content of your manuscript. "Related" means any relation with for-profit or not-for-profit third parties whose interests may be affected by the content of the manuscript. Disclosure represents a commitment to transparency and does not necessarily indicate a bias. If you are in doubt about whether to list a relationship/activity/interest, it is preferable that you do so.

The following questions apply to the author's relationships/activities/interests as they relate to the current manuscript only.

The author's relationships/activities/interests should be defined broadly. For example, if your manuscript pertains to the epidemiology of hypertension, you should declare all relationships with manufacturers of antihypertensive medication, even if that medication is not mentioned in the manuscript.

In item #1 below, report all support for the work reported in this manuscript without time limit. For all other items, the time frame for disclosure is the past 36 months.

|                                                           |                                                                                                                                                                                | Name all entities with whom you have this relationship or indicate none (add rows as needed) | Specifications/Comments (e.g., if payments were made to you or to your institution) |
|-----------------------------------------------------------|--------------------------------------------------------------------------------------------------------------------------------------------------------------------------------|----------------------------------------------------------------------------------------------|-------------------------------------------------------------------------------------|
| <b>Time frame: Since the initial planning of the work</b> |                                                                                                                                                                                |                                                                                              |                                                                                     |
| 1                                                         | All support for the present manuscript (e.g., funding, provision of study materials, medical writing, article processing charges, etc.)<br><b>No time limit for this item.</b> | __X__ None                                                                                   |                                                                                     |
|                                                           |                                                                                                                                                                                |                                                                                              |                                                                                     |
|                                                           |                                                                                                                                                                                |                                                                                              |                                                                                     |
|                                                           |                                                                                                                                                                                |                                                                                              |                                                                                     |
|                                                           |                                                                                                                                                                                |                                                                                              |                                                                                     |
|                                                           |                                                                                                                                                                                |                                                                                              |                                                                                     |
|                                                           |                                                                                                                                                                                |                                                                                              |                                                                                     |
| <b>Time frame: past 36 months</b>                         |                                                                                                                                                                                |                                                                                              |                                                                                     |
| 2                                                         | Grants or contracts from any entity (if not indicated in item #1 above).                                                                                                       | AstraZeneca                                                                                  | Institution                                                                         |
|                                                           |                                                                                                                                                                                | Daiichi Sankyo                                                                               | Institution                                                                         |
| 3                                                         | Royalties or licenses                                                                                                                                                          | __X__ None                                                                                   |                                                                                     |
|                                                           |                                                                                                                                                                                |                                                                                              |                                                                                     |
|                                                           |                                                                                                                                                                                |                                                                                              |                                                                                     |
| 4                                                         | Consulting fees                                                                                                                                                                | ___ None                                                                                     |                                                                                     |
|                                                           |                                                                                                                                                                                | Chugai, Eisai, Eli Lilly, Novartis, Pfizer, Roche                                            | Personal                                                                            |

|    |                                                                                                              |                                                               |          |
|----|--------------------------------------------------------------------------------------------------------------|---------------------------------------------------------------|----------|
|    |                                                                                                              | Seagen                                                        | Personal |
| 5  | Payment or honoraria for lectures, presentations, speakers bureaus, manuscript writing or educational events | Novartis, Pfizer, AstraZeneca                                 | Personal |
| 6  | Payment for expert testimony                                                                                 | <input checked="" type="checkbox"/> None                      |          |
| 7  | Support for attending meetings and/or travel                                                                 | AstraZeneca, Daiichi Sankyo, Chugai, Novartis, Pfizer, Gilead | Personal |
| 8  | Patents planned, issued or pending                                                                           | <input checked="" type="checkbox"/> None                      |          |
| 9  | Participation on a Data Safety Monitoring Board or Advisory Board                                            | AstraZeneca, Daiichi Sankyo, BMS, MSD                         | Personal |
|    |                                                                                                              | Chugai, Eisai, Eli Lilly, Novartis, Pfizer, Roche             | Personal |
|    |                                                                                                              | Seagen                                                        | Personal |
| 10 | Leadership or fiduciary role in other board, society, committee or advocacy group, paid or unpaid            | <input checked="" type="checkbox"/> None                      |          |
| 11 | Stock or stock options                                                                                       | <input checked="" type="checkbox"/> None                      |          |
| 12 | Receipt of equipment, materials, drugs, medical writing, gifts or other services                             | <input checked="" type="checkbox"/> None                      |          |
| 13 | Other financial or non-financial interests                                                                   | <input checked="" type="checkbox"/> None                      |          |

**Please summarize the above conflict of interest in the following box:**

WJ received grants from AstraZeneca and Daiichi Sankyo, and received consulting fee from Chugai, Eisai, Eli Lilly, Novartis, Pfizer, Roche and Seagen. WJ received payment from Novartis, Pfizer, AstraZeneca and was supported by AstraZeneca, Daiichi Sankyo, Chugai, Novartis, Pfizer, Gilead, and participated on Board member of AstraZeneca, Daiichi Sankyo, BMS, MSD; Chugai, Eisai, Eli Lilly, Novartis, Pfizer, Roche ; and Seagen.

**Please place an "X" next to the following statement to indicate your agreement:**

I certify that I have answered every question and have not altered the wording of any of the questions on this form.
